# Supplementary material for: Transparent Fiber-Reinforced Composites Based on a Thermoset Resin Using Liquid Composite Molding (LCM) Techniques
Source: MDPI journal article supplement (doi:10.3390/ma14206087), 2021-10-14
Supplement: s1 [file s1]

# Transparent Fiber-Reinforced Composites Based on a Thermoset Resin Using Liquid Composite Molding (LCM) Techniques

Yavuz Caydamli <sup>1,2,†</sup>, Klaus Heudorfer <sup>3,†</sup>, Jens Take <sup>3</sup>, Filip Podjaski <sup>4</sup>, Peter Middendorf <sup>3,\*</sup> and Michael R. Buchmeiser <sup>1,2,\*</sup>

- <sup>1</sup> Institute of Polymer Chemistry (IPOC), University of Stuttgart, Pfaffenwaldring 55, D-70569 Stuttgart, Germany; yavuz.caydamli@ipoc.uni-stuttgart.de (Y.C.)
- <sup>2</sup> German Institutes of Textile and Fiber Research (DITF), Körschtalstr. 26, D-73770 Denkendorf, Germany
- <sup>3</sup> Institute of Aircraft Design (IFB), University of Stuttgart, Pfaffenwaldring 31, D-70569 Stuttgart, Germany; heudorfer@ifb.uni-stuttgart.de (K.H.); take@ifb.uni-stuttgart.de (J.T.)
- <sup>4</sup> Nanochemistry Department, Max-Planck-Institute for Solid State Research, Heisenbergstr. 1, D-70569 Stuttgart, Germany; podjaski@fkf.mpg.de (F.P.)
- \* Correspondence: peter.middendorf@ifb.uni-stuttgart.de (P.M.); michael.buchmeiser@ipoc.uni-stuttgart.de (M.R.B.)
- † The authors contributed equally.

**Table S1.** Summary of the properties of selected fiber-reinforced composites from the literature.

| Matrix            | Reinforcement                                     | %Transmission       | Sample Thickness [mm] | Fiber v.%         | Tensile Strength [MPa] | Modulus [GPa] | Ref.    |
|-------------------|---------------------------------------------------|---------------------|-----------------------|-------------------|------------------------|---------------|---------|
| PMMA              | Melt-spun BK10 optical glass fibers               | 81.7 (600 nm, 20°C) | N/A                   | 10.4              | 5.9                    | N/A           | [21]    |
|                   |                                                   | 44.8 (600 nm, 20°C) | N/A                   | 34.8              | 19.5                   | N/A           |         |
| Epoxy             | E-glass fibers                                    | N/A                 | ≈ 1                   | 40.28             | 374.9 ± 23.53          | 31.74 ± 1.89  | [24-25] |
| Epoxy             | S-glass Fabric                                    | 84 (600 nm)         | 0.65                  | 37                | N/A                    | N/A           | [26]    |
|                   |                                                   | 71 (600 nm)         | 1.1                   | 32                | N/A                    | N/A           |         |
|                   |                                                   | N/A                 | 0.99                  | 34                | 278 ± 9                | 16.4 ± 1.2    |         |
| Synthesized epoxy | Commercial woven fabrics made from S-glass fibers | N/A                 | ≈ 1                   | N/A               | 624.6 ± 32.8           | 17.86 ± 1.32  | [27]    |
| EPSH              | Continuous E-glass fiber mat                      | ≈80 (550 nm)        | 1                     | 25 wt%            | ≈160                   | N/A           | [30]    |
| EPSH              | E-glass woven fabric                              | ≈78 (550 nm)        | 1                     | 10 layers         | ≈150                   | N/A           |         |
| EPSH              | Chopped E-glass strands dispensed in EPSH         | ≈76 (550 nm)        | 1                     | 25 wt%            | ≈65                    | N/A           |         |
| EPSH              | Chopped strands + E-glass Woven fabric            | 80 (550 nm)         | N/A                   | 5 wt% + 10 layers | ≈245                   | N/A           |         |
| Epoxy + MMA       | Commercial woven fabrics made from E-glass fibers | 88 (560 nm)         | 1                     | 45                | N/A                    | N/A           |         |
| Polyester         | Commercial woven fabrics made from E-glass fibers | 78 (560 nm)         | 1                     | 45                | N/A                    | N/A           | [8]     |

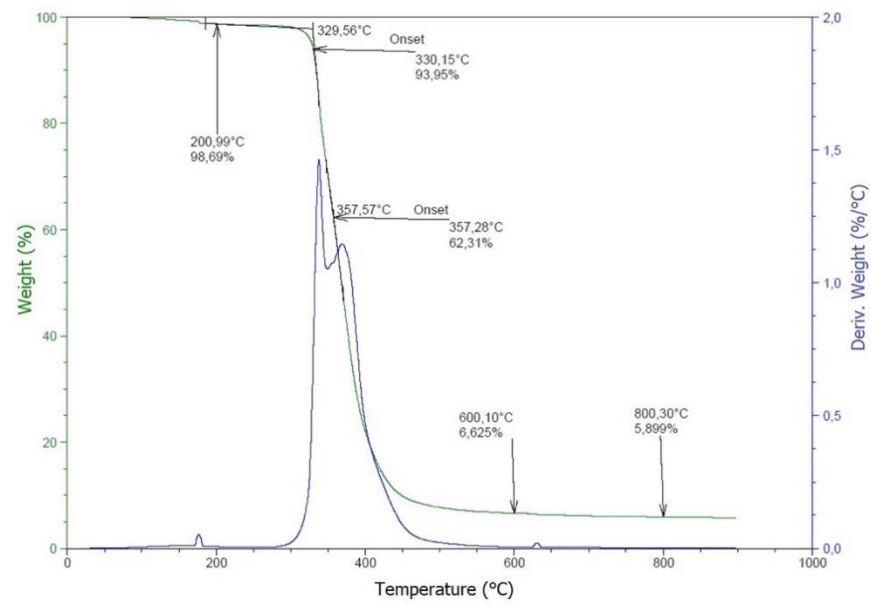

Figure S1. TGA of a 0-layer sample prepared by RTM.

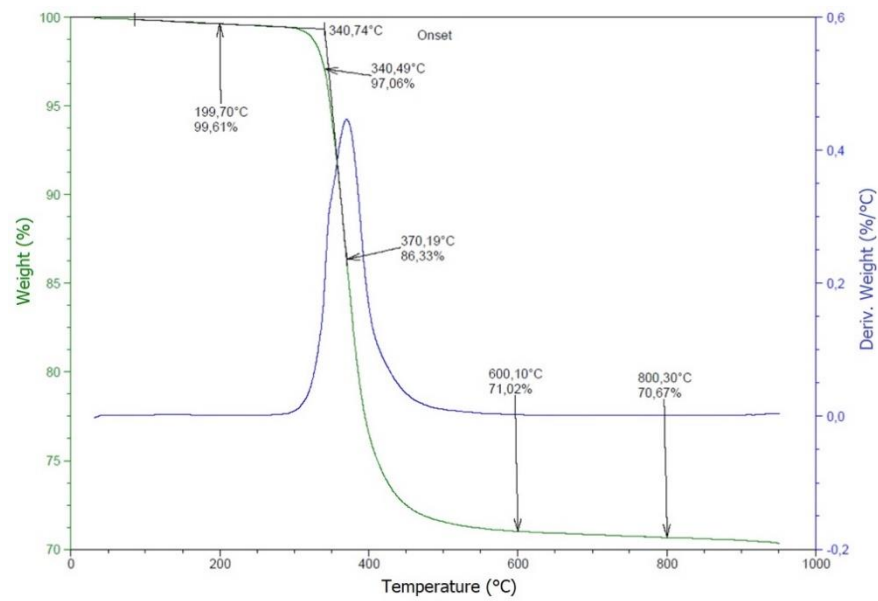

Figure S2. TGA of a 29-layer sample prepared by RTM.

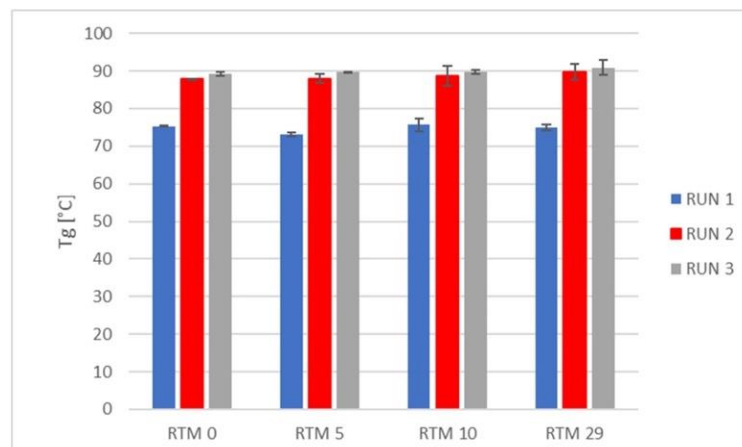

Figure S3. DSC results of the RTM samples.
